# Supplementary material for: A functional conserved intronic G run in HIV-1 intron 3 is critical to counteract APOBEC3G-mediated host restriction
Source: PubMed Central journal article supplement (PMC4163160; doi:10.1186/s12977-014-0072-1), 2014-08-29

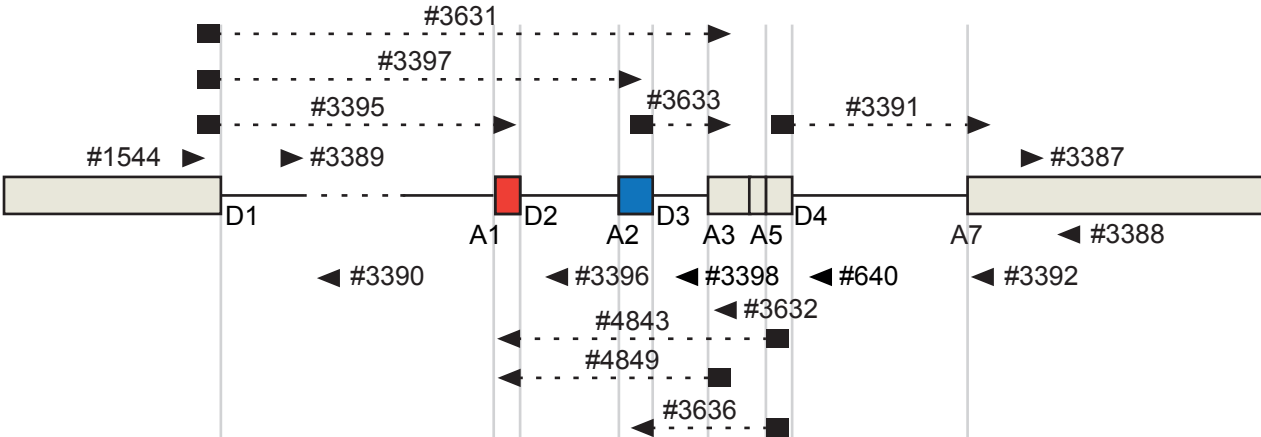

Supplement: 12977_2014_72_MOESM1_ESM.pdf [file 12977_2014_72_MOESM1_ESM.pdf]
